# Supplementary material for: (−)-Epigallocatechin gallate inhibits stemness and tumourigenicity stimulated by AXL receptor tyrosine kinase in human lung cancer cells
Source: PubMed Central journal article supplement (PMC7016176; doi:10.1038/s41598-020-59281-z), 2020-02-12
Supplement: 41598_2020_59281_MOESM1_ESM.pdf [file 41598_2020_59281_MOESM1_ESM.pdf]

# **(-)-Epigallocatechin gallate inhibits stemness and tumorigenicity stimulated by AXL receptor tyrosine kinase in human lung cancer cells**

Kozue Namiki<sup>1,2†</sup>, Pattama Wongsirisin<sup>1,2†</sup>, Shota Yokoyama<sup>1,2</sup>, Motoi Sato<sup>1,2</sup>, Anchalee Rawangkan<sup>1,2,3</sup>, Ryo Sakai<sup>1,2</sup>, Keisuke Iida<sup>1,2,4</sup> & Masami Suganuma<sup>1,2,\*</sup>

<sup>1</sup>Graduate School of Science and Engineering, Saitama University, Saitama 338-8570, Japan

<sup>2</sup>Research Institute for Clinical Oncology, Saitama Cancer Center, Saitama 362-0806, Japan

<sup>3</sup>School of Medical Science, University of Phayao, Phayao, Thailand 56000

<sup>4</sup>Molecular Chirality Research Center and Department of Chemistry, Graduate School of Science, Chiba University, Chiba 263-8522, Japan

\*Correspondence to: [masami0306@mail.saitama-u.ac.jp](mailto:masami0306@mail.saitama-u.ac.jp)

†Co-first authors with equal contribution

# Supplementary Fig. S1

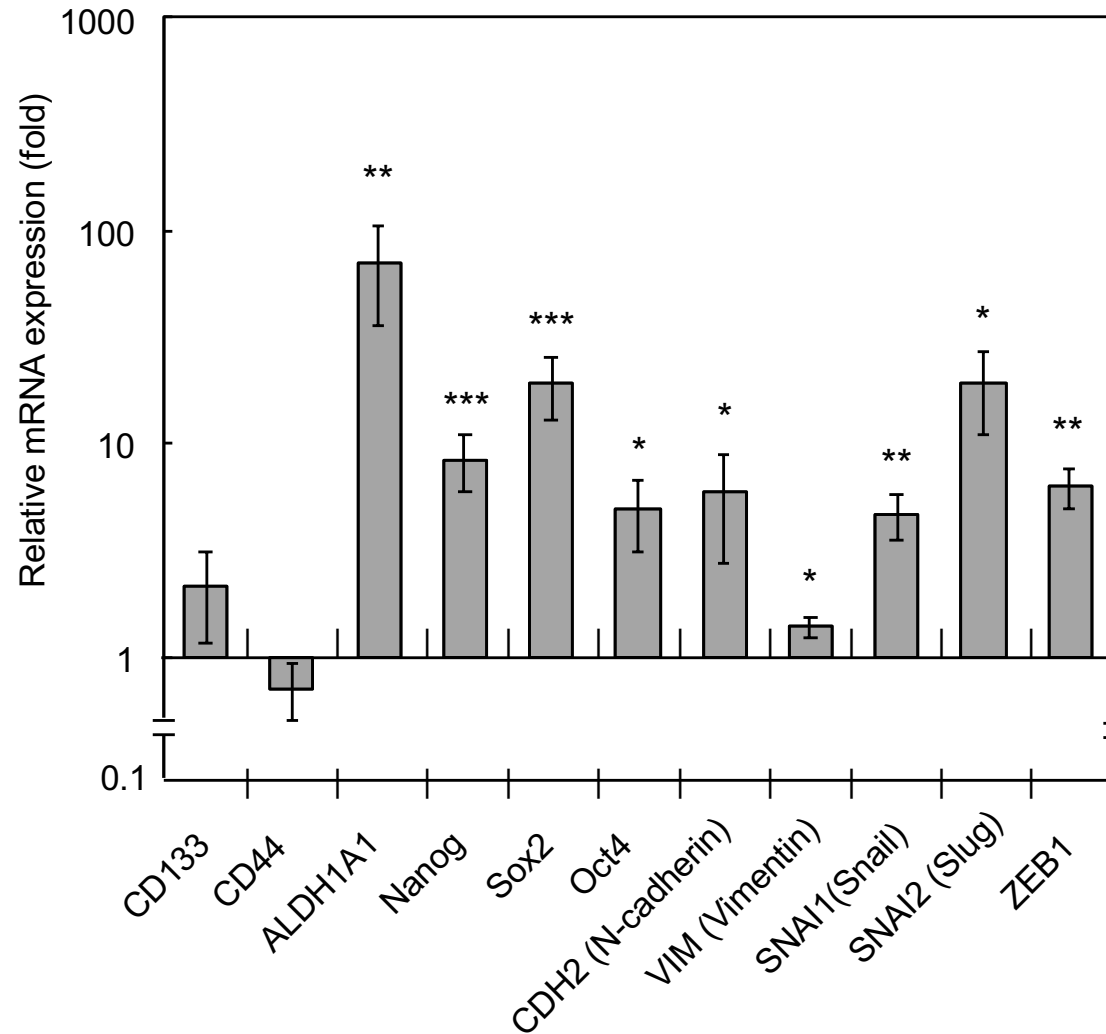

Expression of stemness-marker genes and EMT-related genes in H1299-sdCSCs. Numbers indicate the relative mRNA expression compared with that in H1299-parental cells. Results are mean  $\pm$  SD from three independent experiments. \*\*\*:  $p < 0.001$ , \*\*:  $p < 0.01$ , \*:  $p < 0.05$

## Supplementary Fig. S2

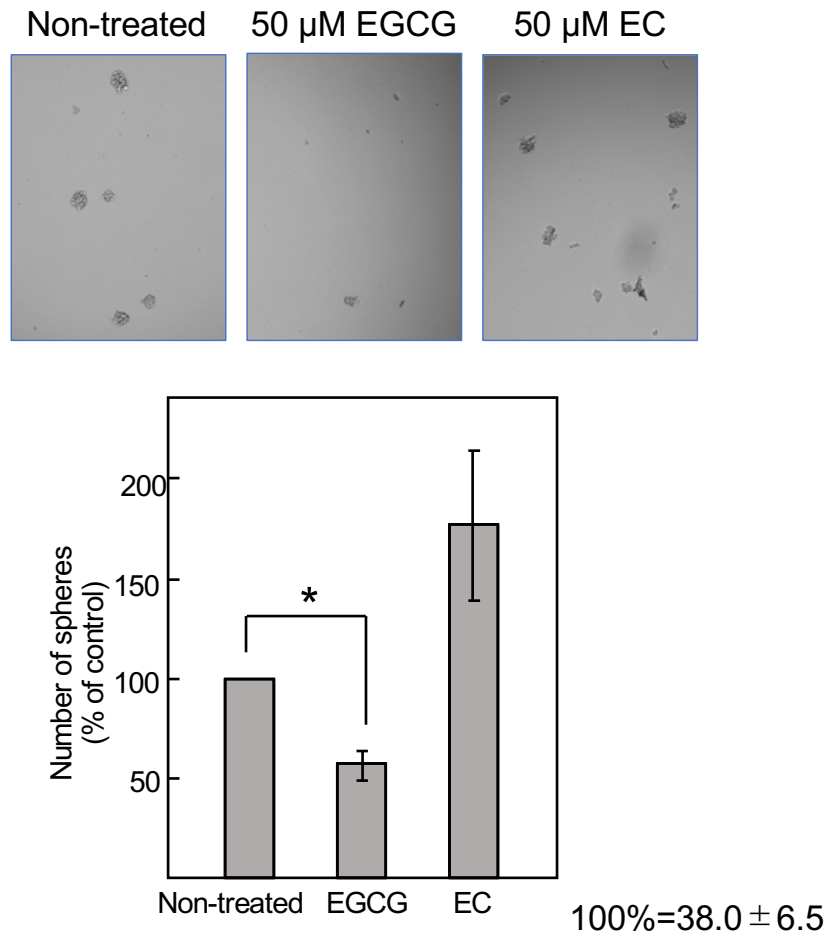

EGCG inhibited tumor sphere formation in Lu99 cells. Lu99 cells were cultured in serum-free medium in the presence of 50 μM EGCG or 50 μM EC for one week. (A) Percentage of tumor spheres of non-treated cells are shown in the graph. Photos show representative tumor spheres. The results are the mean ± SD of three independent experiments. \*:  $p < 0.05$

# Supplementary Fig. S3

(A)

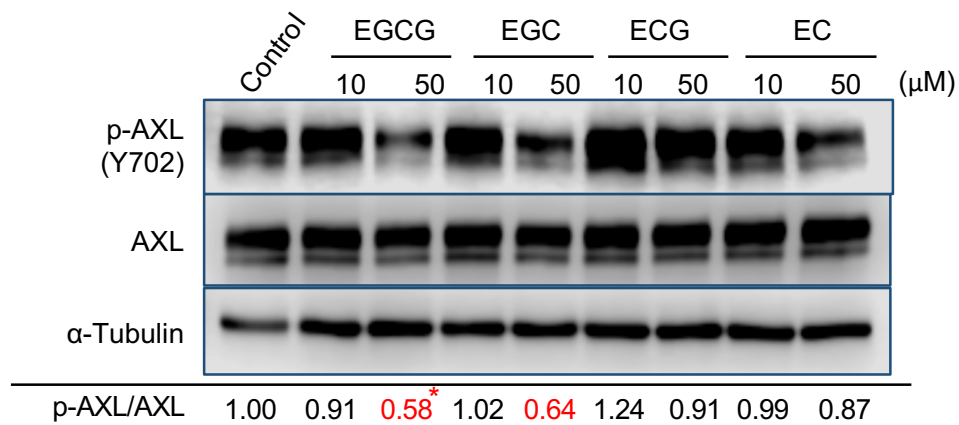

(B)

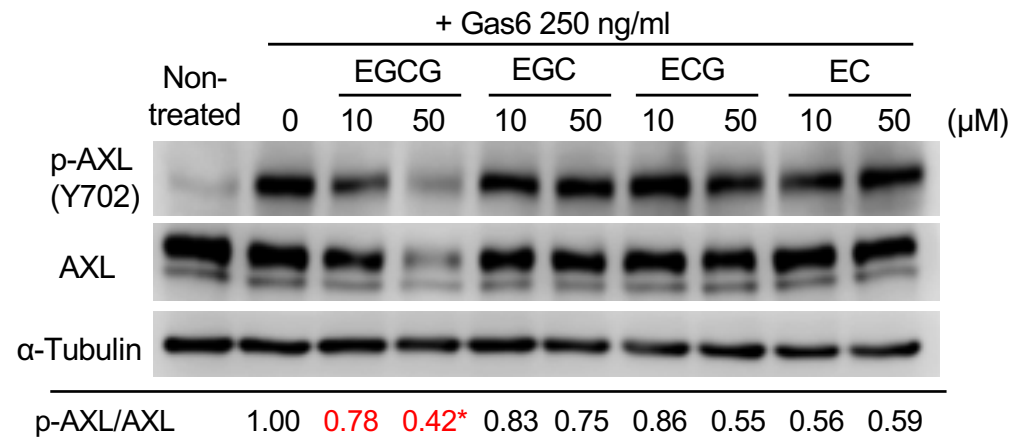

EGCG reduced the p-AXL levels compared with those of the H1299-parental control cells in the absence and presence of GAS6.  $\alpha$ -Tubulin was used as a control. Numbers indicate relative p-AXL/AXL protein levels compared with those in the H1299-parental control cells. Full-length blots/gels are presented in Supplementary Information WB-1 and WB-5. Three independent experiments were conducted.

\*:  $p < 0.05$

## Supplementary Fig. S4

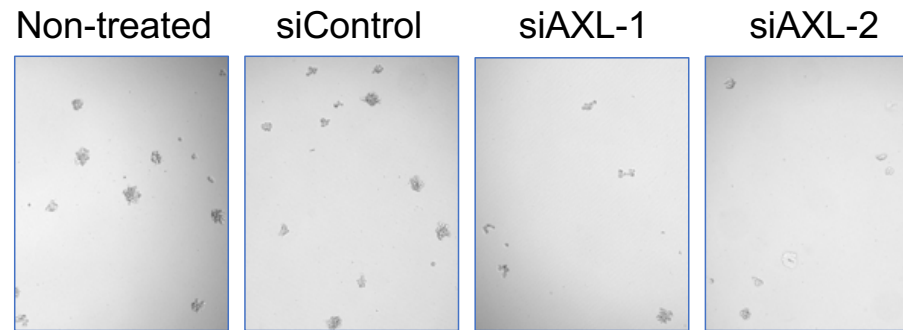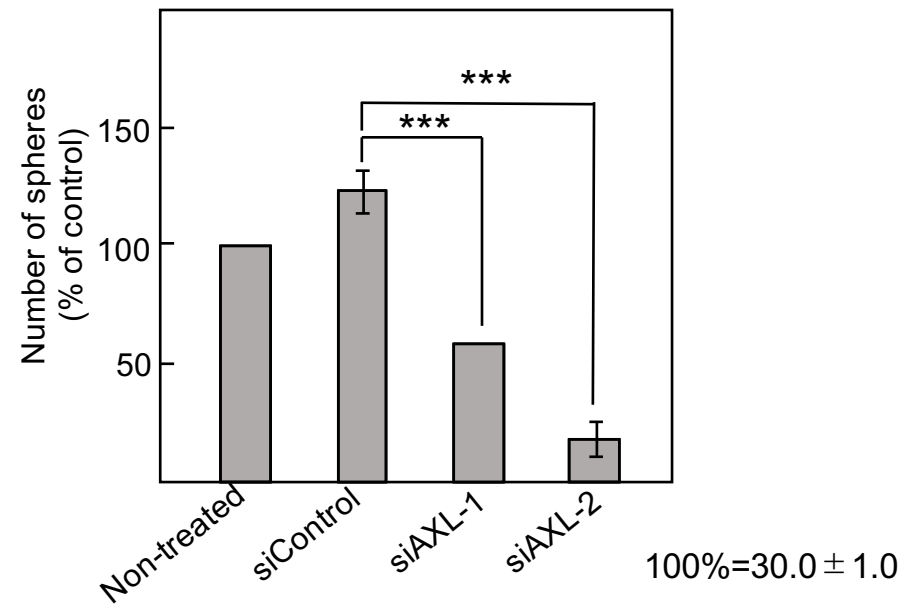

Knockdown of AXL with si AXL-1 and siAXL-2 inhibited tumor sphere formation in Lu99 cells. siAXLs and siControl were treated for 2 days, then the treated cells were cultured in serum-free medium for 1 weeks. (A) Photos show representative tumor spheres. Percentage of tumor spheres of non-treated cells are shown in the graph. The results are the mean  $\pm$  SD of three independent experiments. (B) Reduction of ALDH1A1 protein in EGCG-treated tumor spheres in Lu99 cells. \*\*\*:  $p < 0.001$

## Supplementary Fig. S5

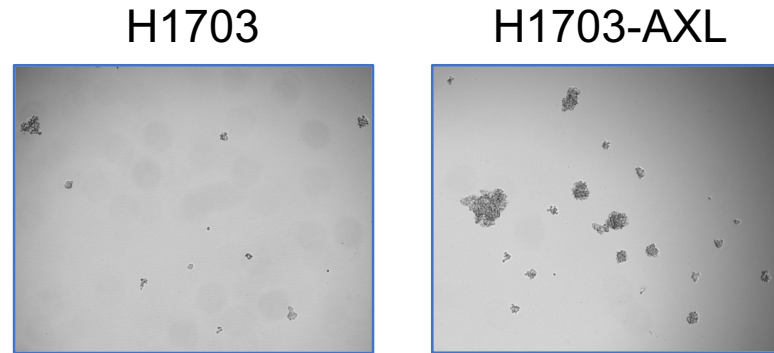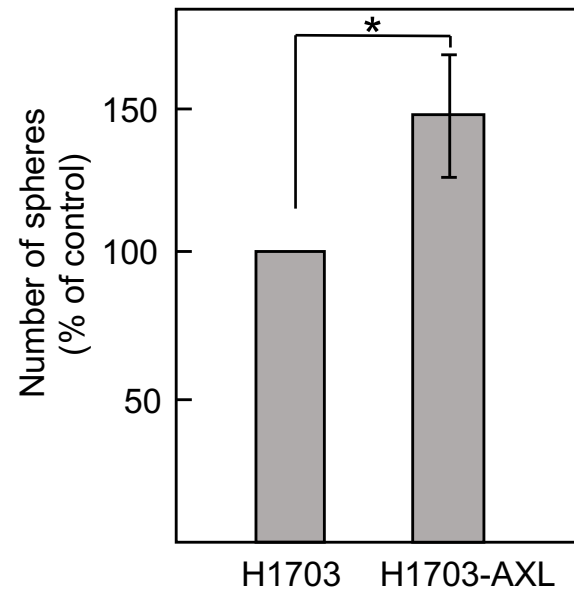

100% =  $57.0 \pm 9.5$

Exogenous *AXL* gene expression stimulates tumor sphere formation. H1703-AXL or H1703 cells were cultured in serum-free medium for 1 week. Photos show representative tumor sphere. Percentage of tumor spheres of non-treated cells are shown in the graph. The results are the mean  $\pm$  SD of three independent experiments. \*:  $p < 0.05$

## Supplementary Table S1

| <b>siRNA</b> | <b>Sequence</b>     |
|--------------|---------------------|
| siControl    | —                   |
| siAXL-1      | GGAAGTGCATGCTGAATGA |
| siAXL-2      | CAGCGAGAUUUAUGACUAU |

Supplementary Table S2

| <b>Primer</b>         |         | <b>Sequence (5' → 3')</b> |
|-----------------------|---------|---------------------------|
| GAPDH                 | Forward | TGGTATCGTGGAAGGACTCATGAC  |
|                       | Reverse | ATGCCACTCAGCTTCCCGTTCAGC  |
| AXL                   | Forward | GTGGGCAACCCAGGGAATATC     |
|                       | Reverse | GTA CTGTCCCGTGTGGGAAAG    |
| Prominin-1<br>(CD133) | Forward | AGTCGGAAACTGGCAGATAGC     |
|                       | Reverse | GGTAGTGTGTACTGGGCCAAT     |
| CD44                  | Forward | TCCAACACCTCCCAGTATGACA    |
|                       | Reverse | GGCAGGTCTGTGACTGATGTACA   |
| Nanog                 | Forward | TTTGTGGGCCTGAAGAAACT      |
|                       | Reverse | AGGGCTGTCCTGAATAAGCAG     |
| Sox2                  | Forward | TACAGCATGTCTACTCGCAG      |
|                       | Reverse | GAGGAAGAGGTAACCACAGGG     |
| POU5F1B<br>(Oct4)     | Forward | GTGTT CAGCCAAAAGACCATCT   |
|                       | Reverse | GGCCTGCATGAGGGTTTCT       |
| ALDH1A1               | Forward | GCACGCCAGACTTACCTGTC      |
|                       | Reverse | CCTCCTCAGTTGCAGGATTAAG    |
| CDH1<br>(E-cadherin)  | Forward | CGACCCAACCCAAGAATCTA      |
|                       | Reverse | AGGCTGTGCCTTCCTACAGA      |
| CDH2<br>(N-cadherin)  | Forward | CCTTGTGCTGATGTTTGTGG      |
|                       | Reverse | TGGATGGGTCTTTCATCCAT      |
| Vimentin              | Forward | GGCTCAGATTCAGGAACAGC      |
|                       | Reverse | TTCCAGGGACTCATTGGTTC      |
| SNAI1<br>(Snail)      | Forward | TCGGAAGCCTAACTACAGCGA     |
|                       | Reverse | AGATGAGCATTGGCAGCGAG      |
| SNAI2<br>(Slug)       | Forward | TGTGACAAGGAATATGTGAGCC    |
|                       | Reverse | TGAGCCCTCAGATTTGACCTG     |
| ZEB1                  | Forward | TTACACCTTTGCATACAGAACCC   |
|                       | Reverse | TTTACGATTACACCCAGACTGC    |
